# Supplementary figures and images for: Vitamin C-induced epigenomic remodelling in IDH1 mutant acute myeloid leukaemia
Source: Springer Nature journal article supplement (doi:10.1038/leu.2017.171), 2017-06-02

# Supplementary Figure 1

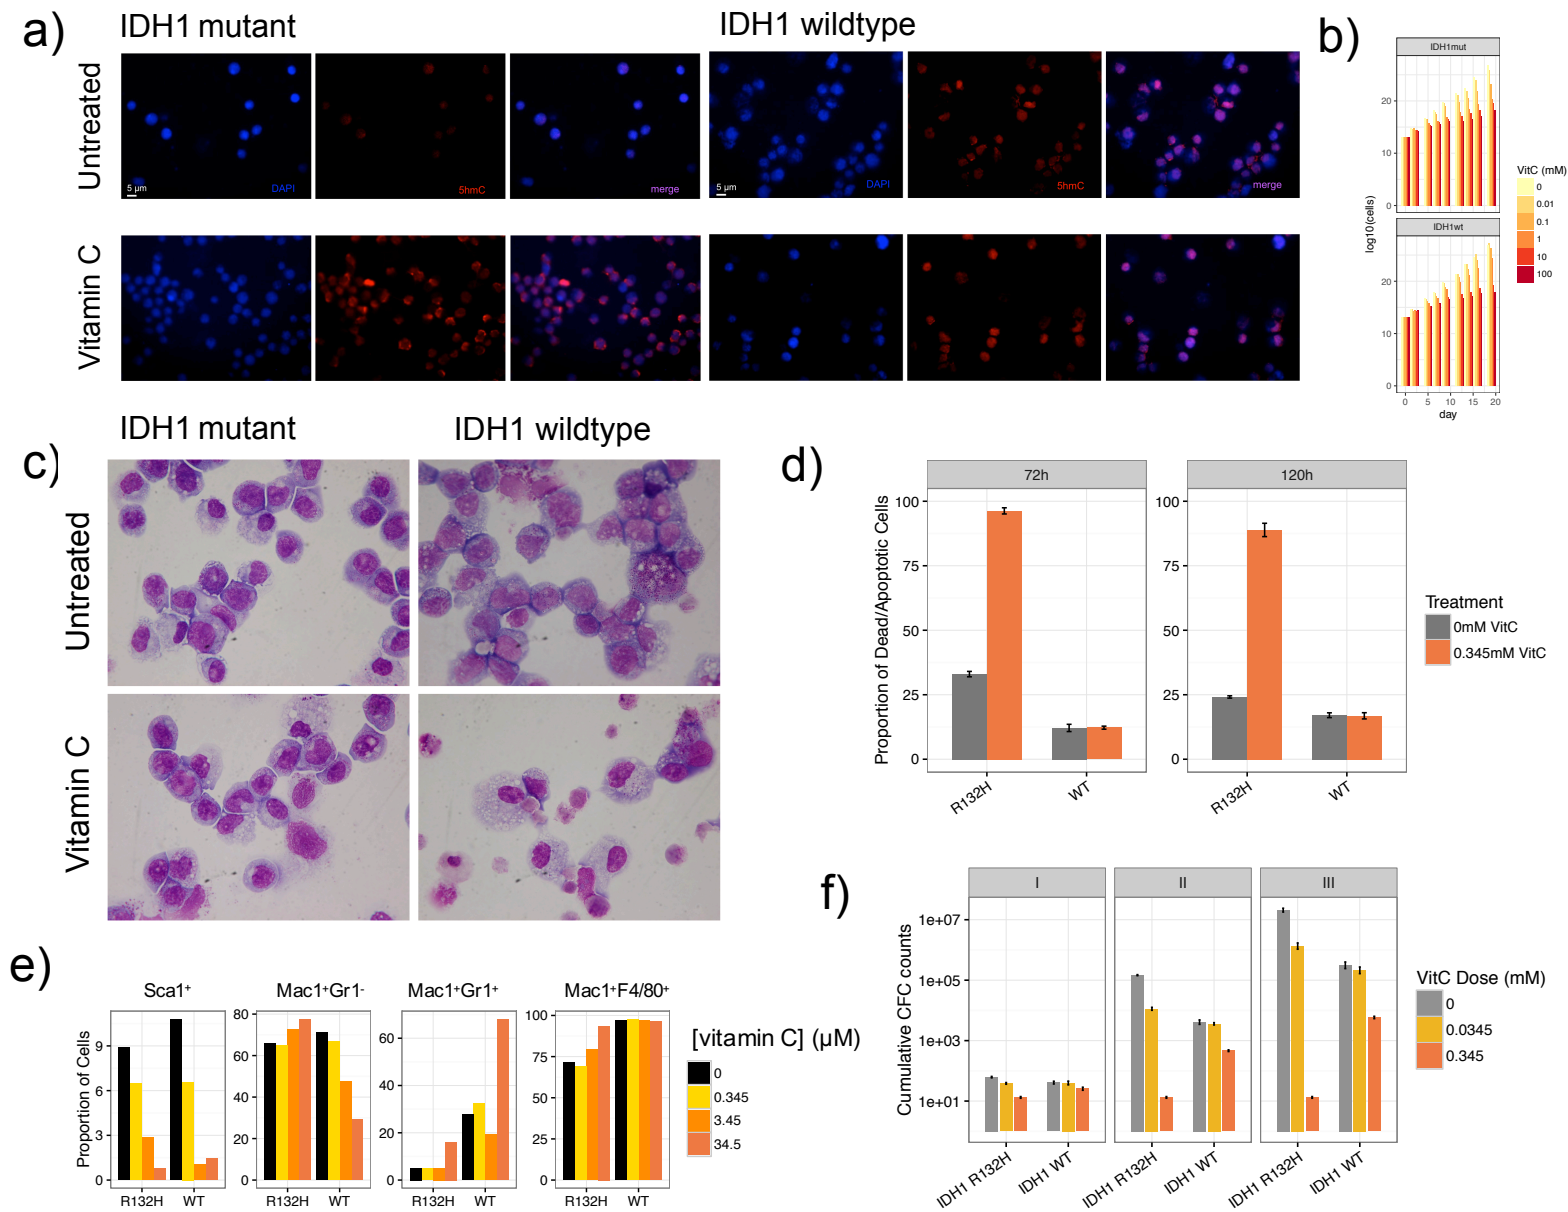

Supplement: 41375_2018_BFleu2017171_MOESM101_ESM.pdf [file 41375_2018_BFleu2017171_MOESM101_ESM.pdf]

# Supplementary Figure 2

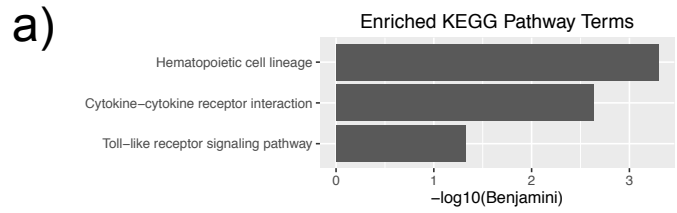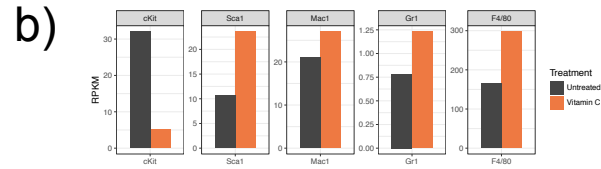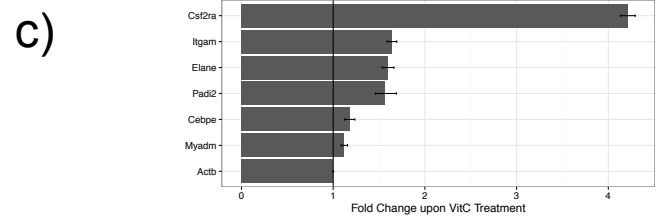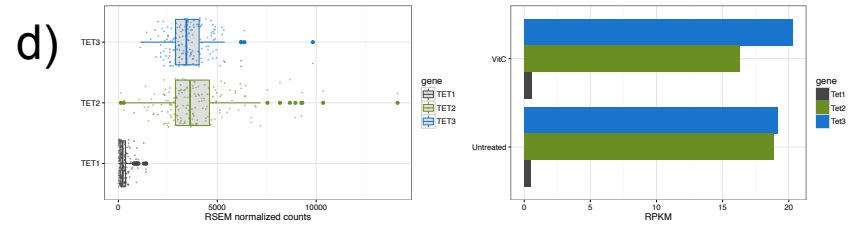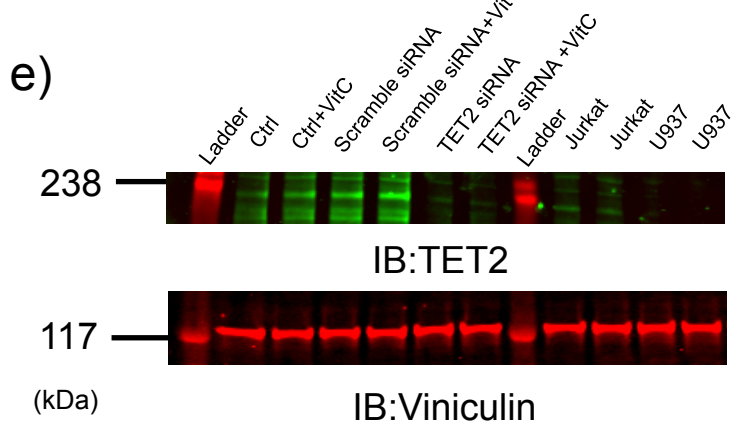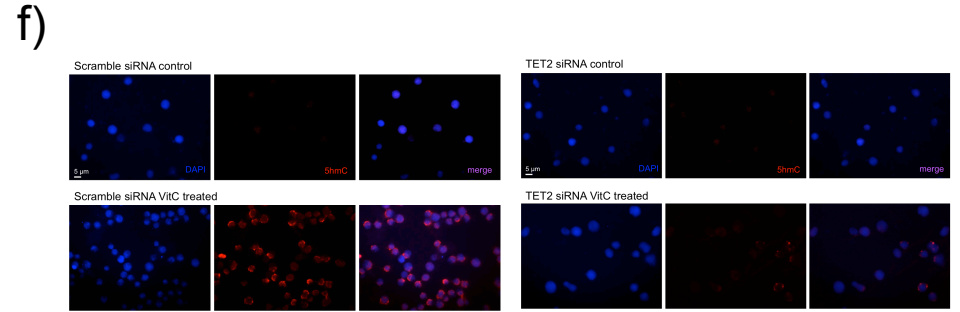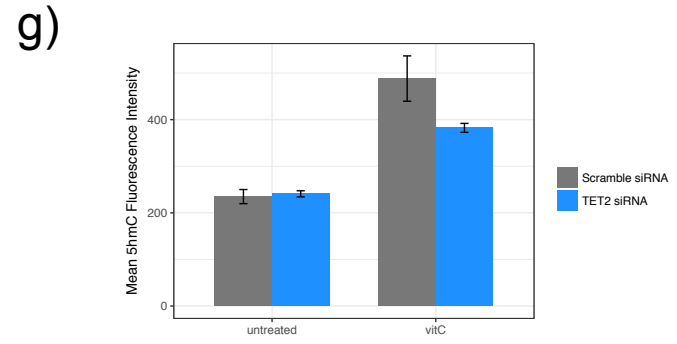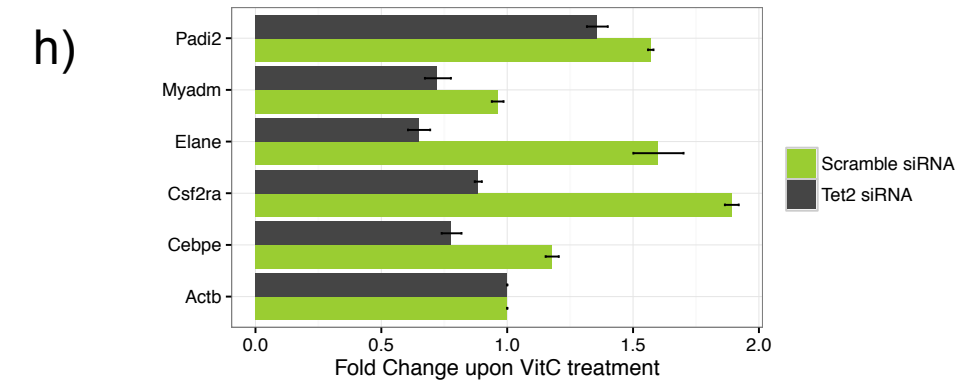

Supplement: 41375_2018_BFleu2017171_MOESM102_ESM.pdf [file 41375_2018_BFleu2017171_MOESM102_ESM.pdf]
